# Supplementary material for: Tri-metallic ZIF mediated synthesis of defect rich N-doped Co3O4/ZnO/NiO S-scheme heterostructure for detection and photocatalytic degradation of persistent organic pollutants
Source: Royal Society of Chemistry journal article supplement (doi:10.1039/d3en00292f), 2023-01-01
Supplement: d3en00292f1.pdf [file d3en00292f1.pdf]

**Tri-metallic ZIF mediated synthesis of defect rich N-doped  $\text{Co}_3\text{O}_4/\text{ZnO}/\text{NiO}$  S-scheme heterostructure for detection and photocatalytic degradation of persistent organic pollutants**

**Abhivyakti<sup>a</sup>, Renu<sup>b</sup>, Sneha Singh<sup>a</sup>, Diksha Aggarwal<sup>a</sup>, Shubham Pathak<sup>a</sup>, Vinod Kumar<sup>c</sup>, Kulbhushan Tikoo<sup>c</sup> and Sonal Singhal<sup>a\*</sup>**

<sup>a</sup> Department of Chemistry, Panjab University, Chandigarh, 160014, India.

<sup>b</sup> Energy Research Centre, Panjab University, Chandigarh, 160014, India.

<sup>c</sup> HR-TEM Facility Lab Department of Pharmacology and Toxicology, National Institute of Pharmaceutical Education and Research (NIPER), SAS Nagar-160062, Punjab, India.

[\\*sonal1174@gmail.com](mailto:sonal1174@gmail.com) ; [sonal@pu.ac.in](mailto:sonal@pu.ac.in)

**CORRESPONDING AUTHOR:**

Sonal Singhal  
Professor,  
Department of Chemistry,  
Panjab University  
Chandigarh, India (160014)  
Ph. No. +91-172-2534421(o)  
+91-9872118810(m)  
**E-mail:** sonal1174@gmail.com

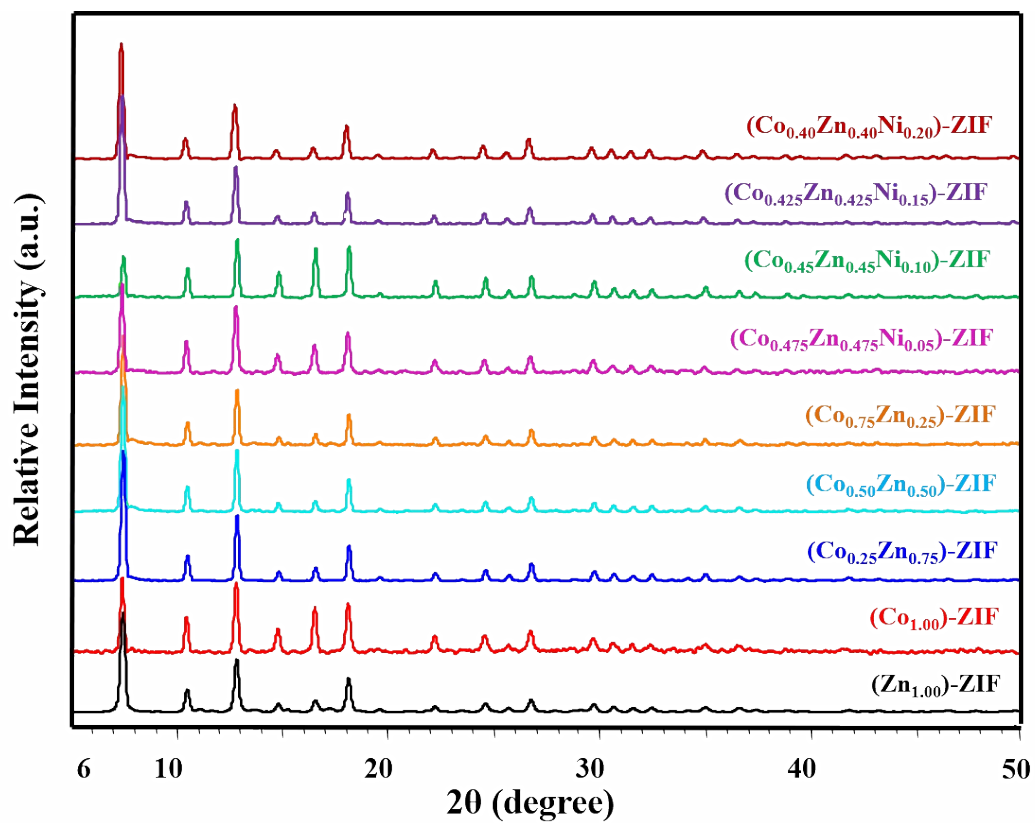

Fig. S1 P-XRD pattern of all the synthesized mono-, bi- and tri-metallic ZIF materials

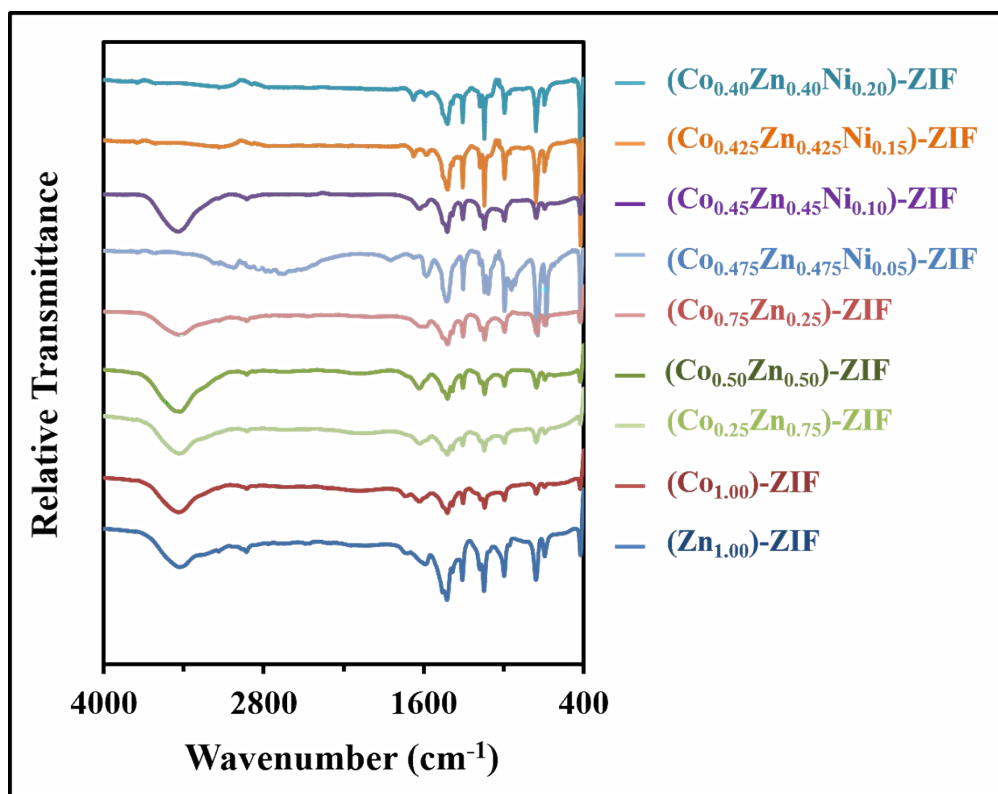

Fig. S2 FT-IR spectra of all the synthesized ZIFs

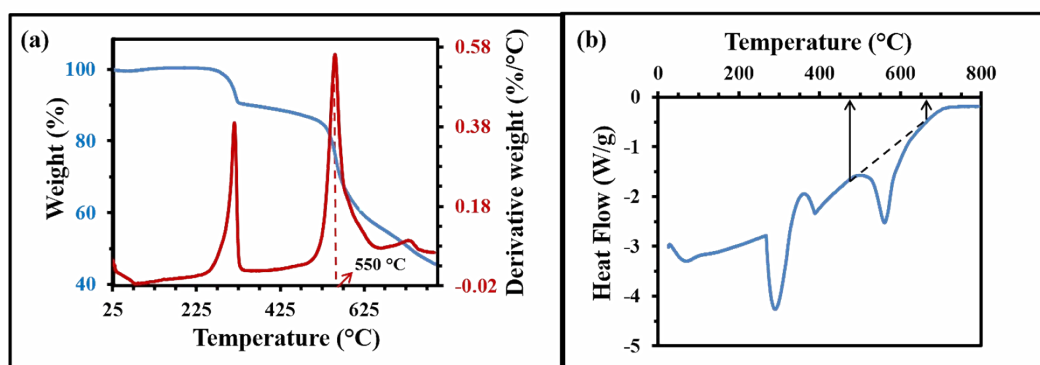

Fig. S3 (a) Derivative weight loss curve coupled with TGA curve and (b) DSC curve of (Co<sub>0.45</sub>Zn<sub>0.45</sub>Ni<sub>0.10</sub>)-ZIF

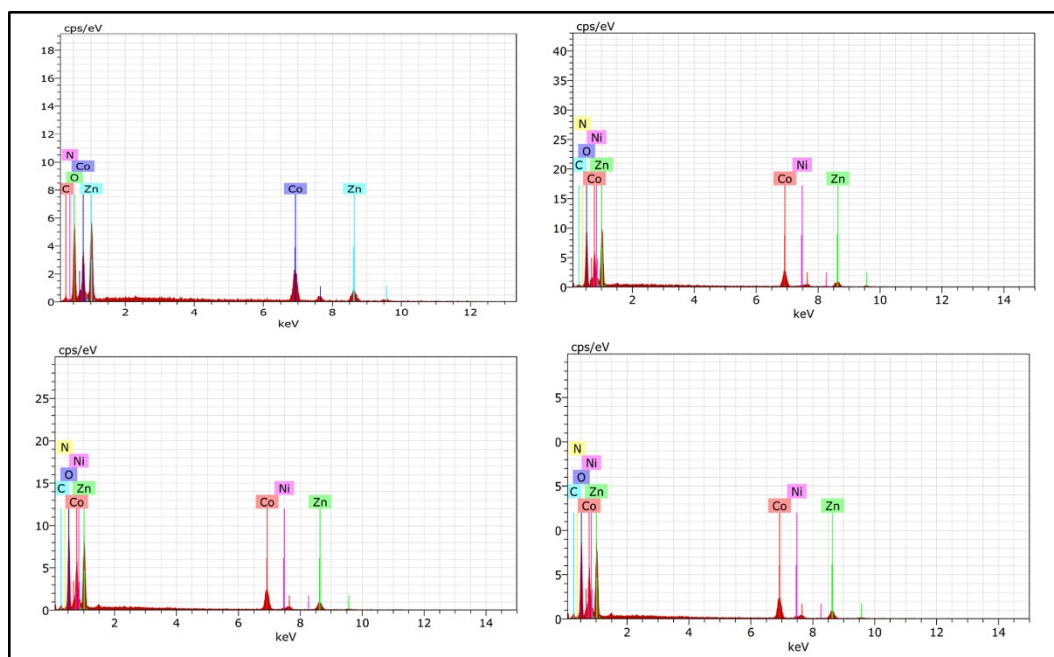

Fig. S4 EDS spectra of : (a)  $(\text{Zn}_{0.50}\text{Co}_{0.50})\text{-600}$ , (b)  $(\text{Zn}_{0.475}\text{Co}_{0.475}\text{Ni}_{0.05})\text{-600}$ , (c)  $(\text{Zn}_{0.425}\text{Co}_{0.425}\text{Ni}_{0.15})\text{-600}$ , and (d)  $(\text{Zn}_{0.40}\text{Co}_{0.40}\text{Ni}_{0.20})\text{-600}$

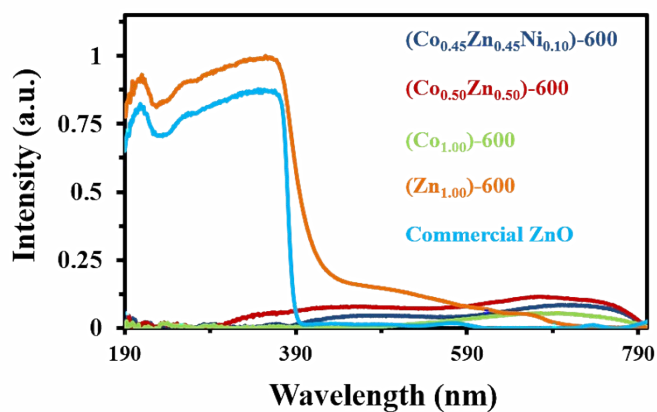

Fig. S5 UV-Vis DRS spectra of Commercial ZnO,  $(\text{Zn}_{1.00})\text{-600}$ ,  $(\text{Co}_{1.00})\text{-600}$ ,  $(\text{Zn}_{0.50}\text{Co}_{0.50})\text{-600}$  and  $(\text{Zn}_{0.45}\text{Co}_{0.45}\text{Ni}_{0.10})\text{-600}$

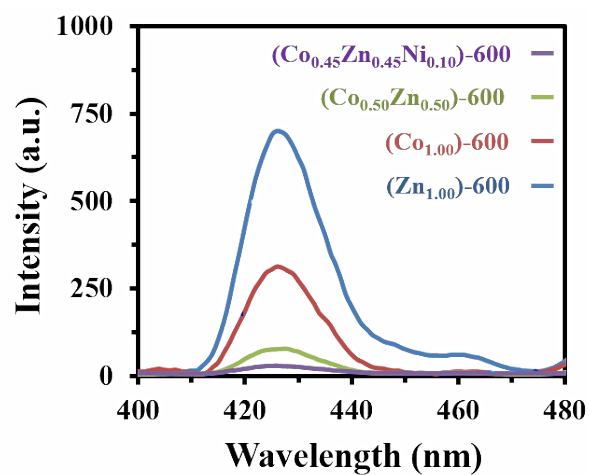

Fig. S6 PL spectra of (Zn<sub>1.00</sub>)-600, (Co<sub>1.00</sub>)-600, (Co<sub>0.50</sub>Zn<sub>0.50</sub>)-600 and (Co<sub>0.45</sub>Zn<sub>0.45</sub>Ni<sub>0.10</sub>)-600

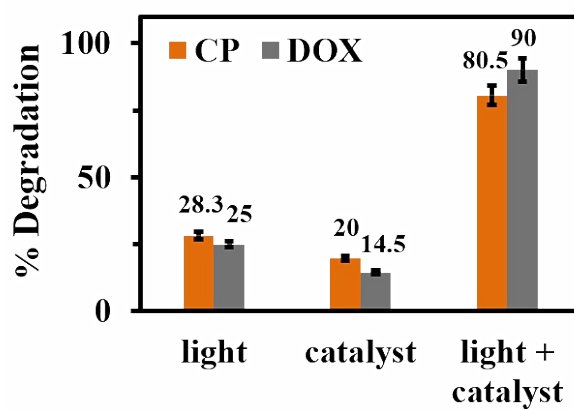

Fig. S7 % Degradation of CP and DOX in presence of light, catalyst and both light as well as catalyst

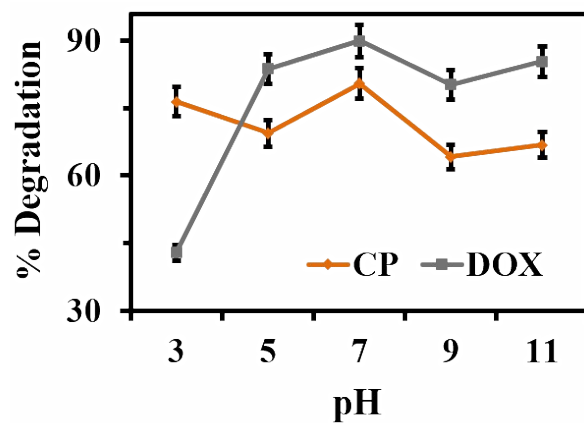

Fig. S8 Effect of pH on the photocatalytic degradation of CP and DOX by  $(\text{Co}_{0.45}\text{Zn}_{0.45}\text{Ni}_{0.10})\text{-600}$

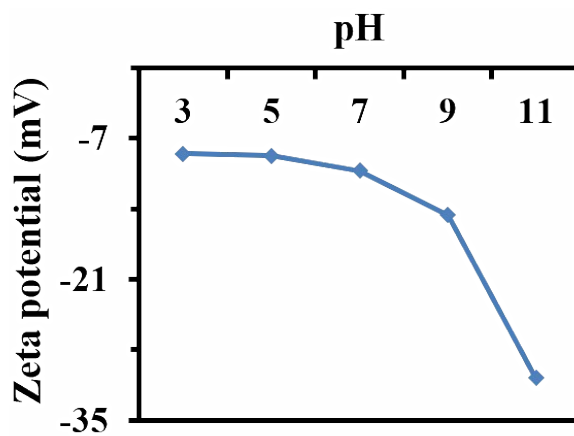

Fig. S9 Zeta potential of  $(\text{Zn}_{0.45}\text{Co}_{0.45}\text{Ni}_{0.10})\text{-600}$  at pH= 3,5,7,9 and 11

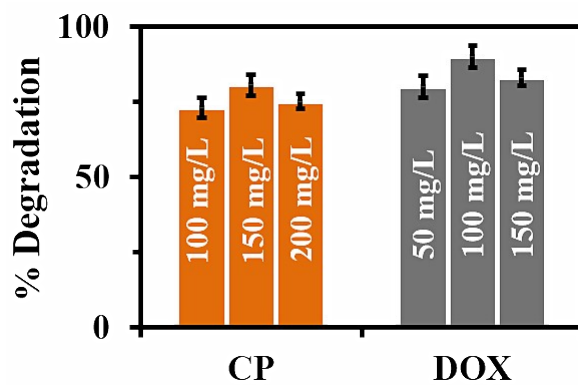

Fig. S10 Effect of variation of  $(\text{Co}_{0.45}\text{Zn}_{0.45}\text{Ni}_{0.10})\text{-600}$  dosage on % degradation of CP and DOX

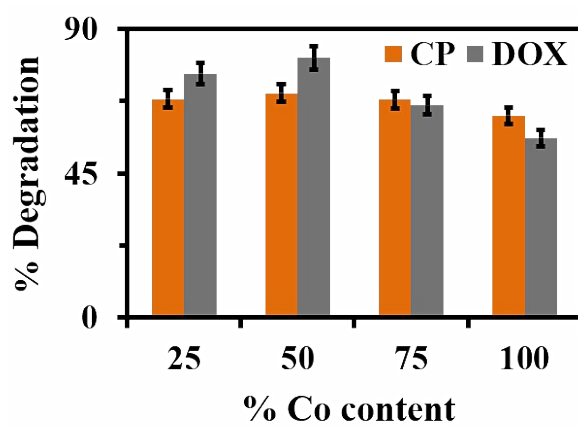

Fig. S11 Effect of variation of Co content on % degradation of CP and DOX

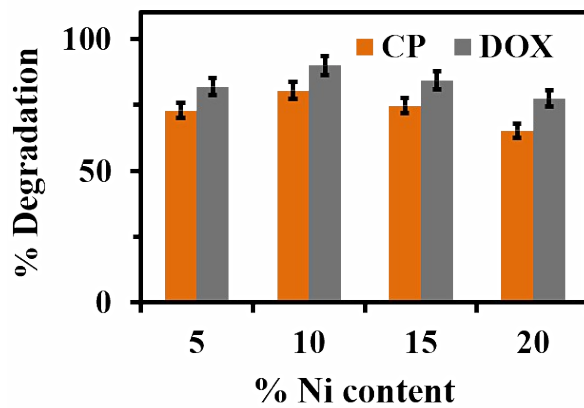

Fig. S12 Effect of variation of Ni content on % degradation of CP and DOX

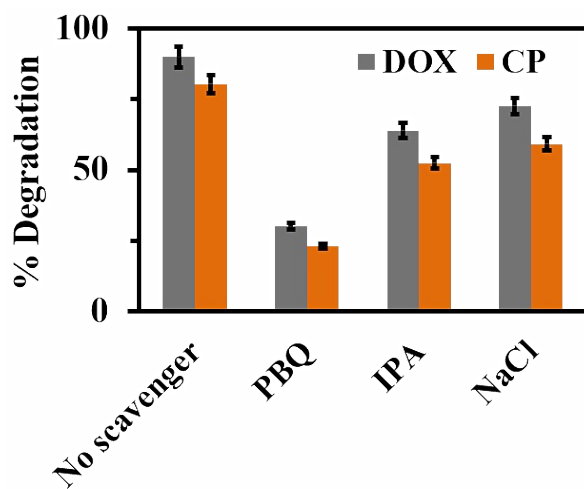

Fig.S13 Radical quenching studies for photocatalytic degradation of DOX and CP utilizing  $(\text{Co}_{0.45}\text{Zn}_{0.45}\text{Ni}_{0.10})\text{-600}$



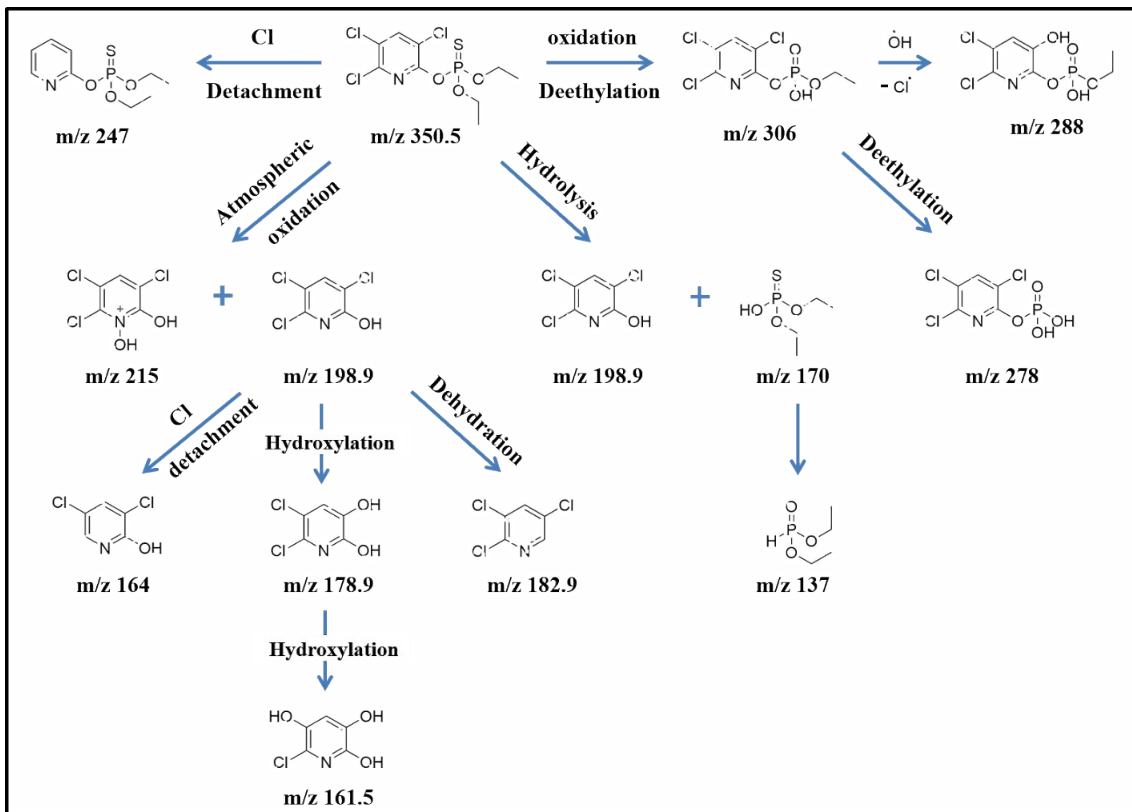

Fig. S14 Suggested structures of intermediates and degradation pathway of CP

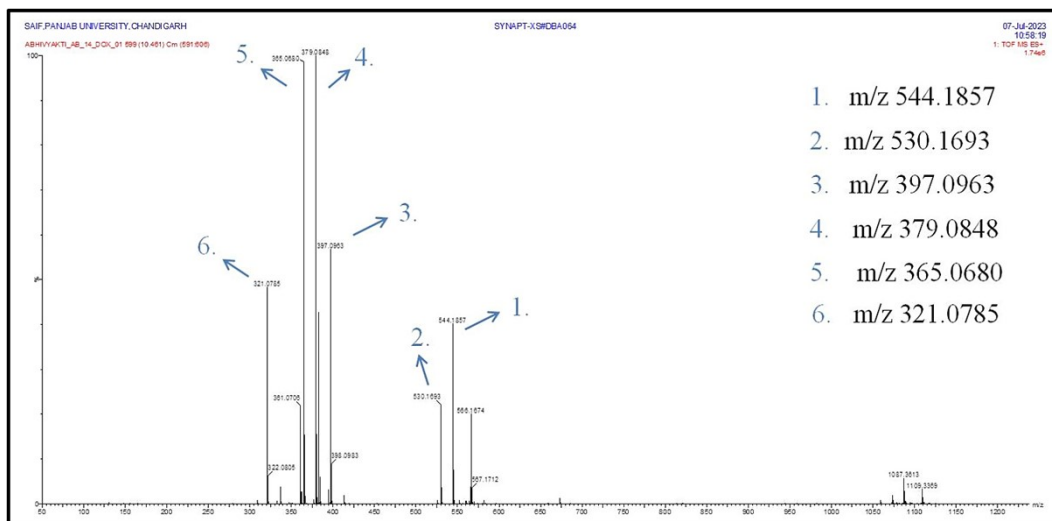

Fig. S15 LC-MS spectra of DOX before visible light illumination

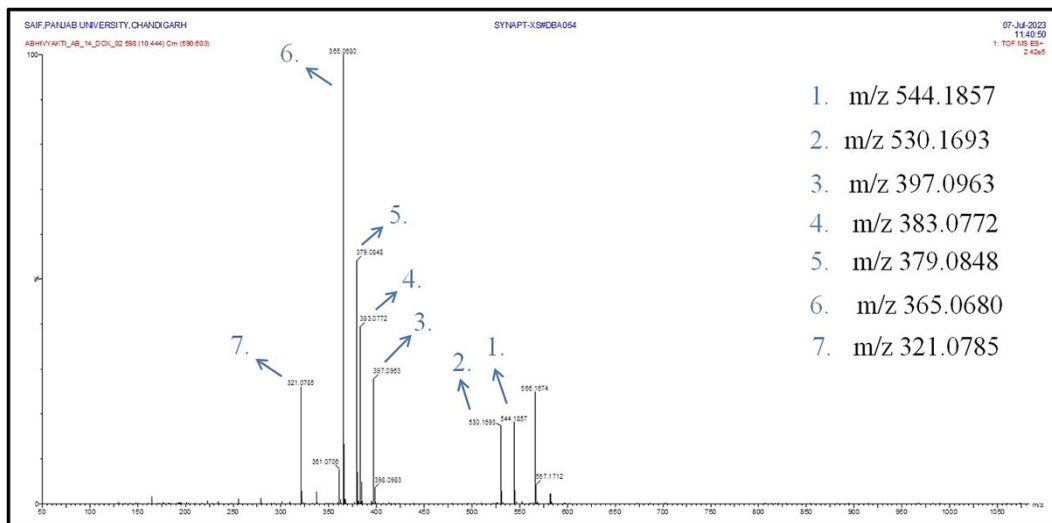

**Fig. S16 LC-MS spectra of DOX degradation after 60 min of visible light illumination**

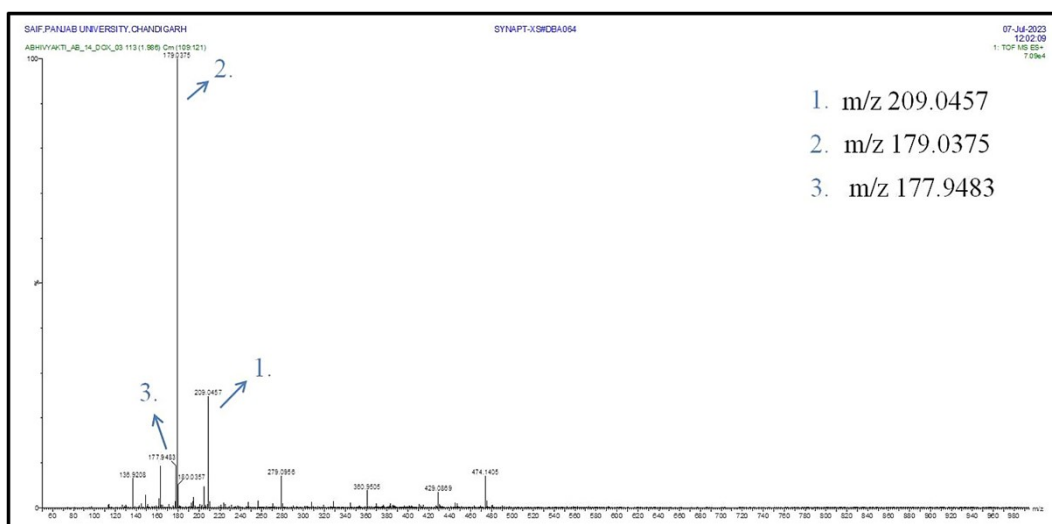

**Fig. S17 LC-MS spectra of DOX degradation after 120 min of visible light illumination**

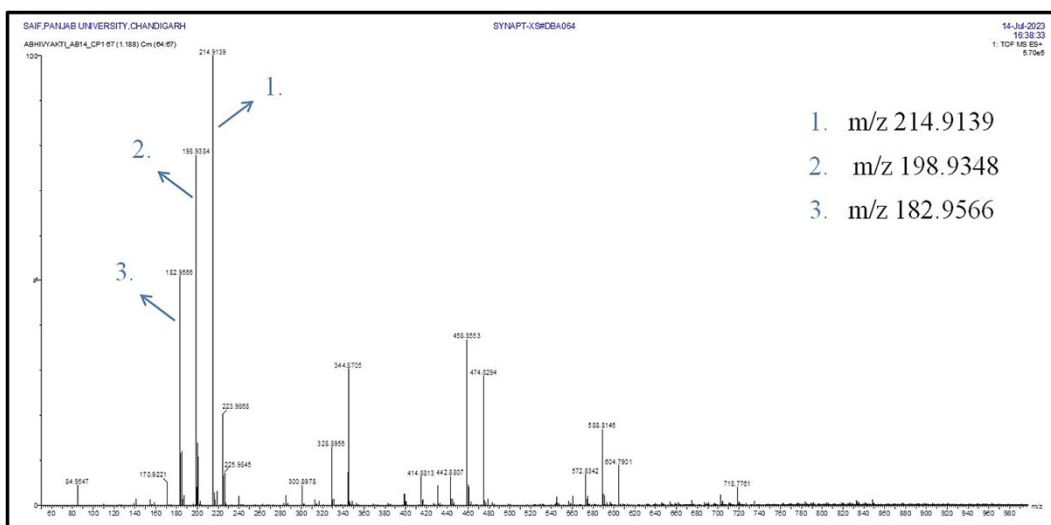

**Fig. S18 LC-MS spectra of CP before visible light illumination**

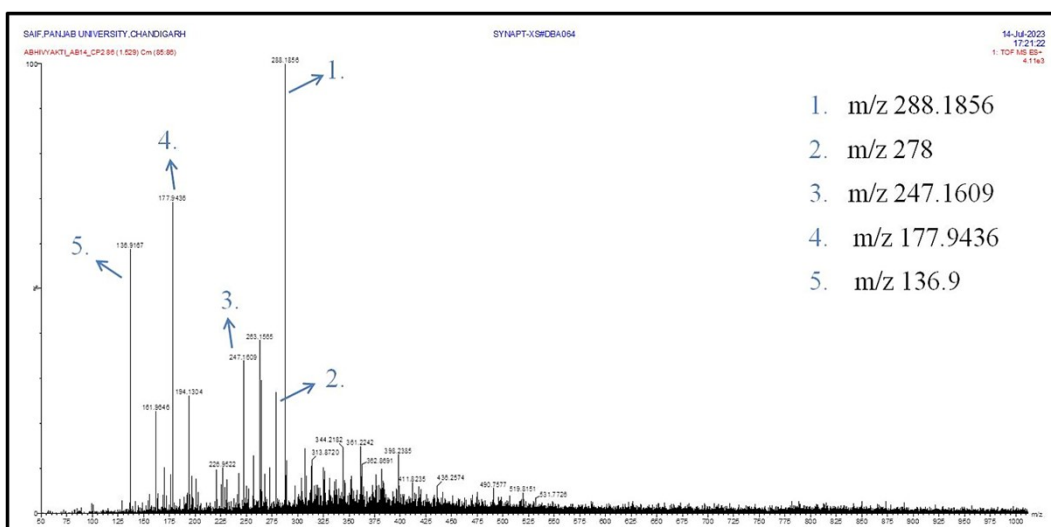

**Fig. S19 LC-MS spectra of CP degradation after 60 min of visible light illumination**

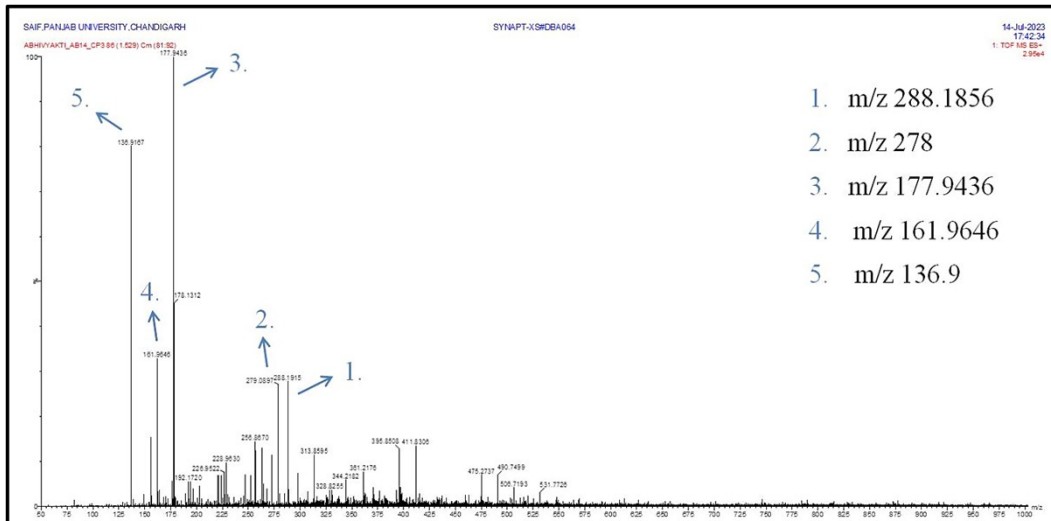

Fig. S20 LC-MS spectra of CP degradation after 120 min of visible light illumination

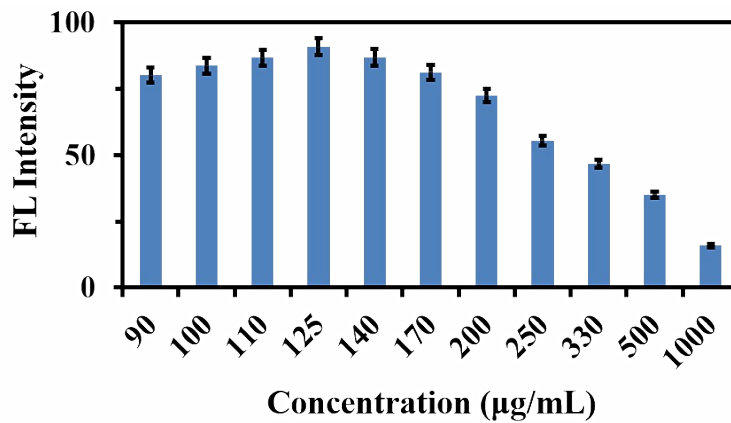

Fig. S21 Effect of sensor concentration on fluorescence intensity

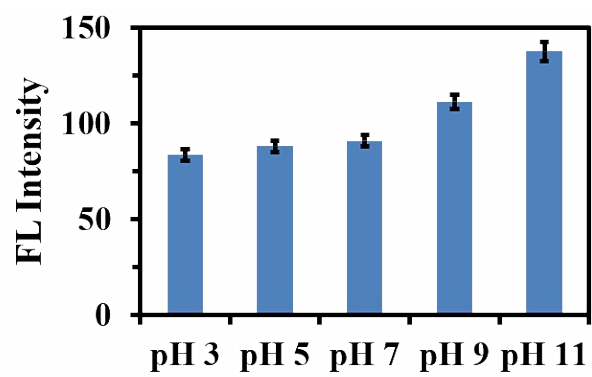

Fig. S22 Effect of pH of the medium on fluorescence intensity of the sensor

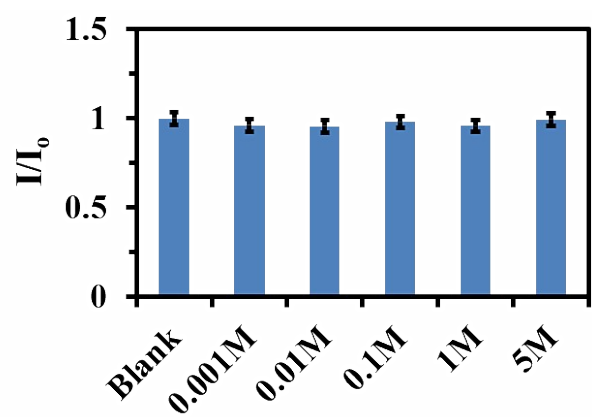

Fig. S23 Effect of ionic strength of the medium on relative fluorescence intensity of the sensor. Blank is the relative fluorescence intensity of sensor in the absence of NaCl

**Table S1 Band gap values estimated from tauc plot of Commercial ZnO, (Zn<sub>1.00</sub>)-600, (Co<sub>1.00</sub>)-600, (Zn<sub>0.50</sub>Co<sub>0.50</sub>)-600 and (Zn<sub>0.45</sub>Co<sub>0.45</sub>Ni<sub>0.10</sub>)-600**

| Material                                                        | Band Gap (eV) |
|-----------------------------------------------------------------|---------------|
| Commercial ZnO                                                  | 3.22          |
| (Zn <sub>1.00</sub> )-600                                       | 3.10          |
| (Co <sub>1.00</sub> )-600                                       | 1.35          |
| (Zn <sub>0.50</sub> Co <sub>0.50</sub> )-600                    | 1.53          |
| (Zn <sub>0.45</sub> Co <sub>0.45</sub> Ni <sub>0.10</sub> )-600 | 1.48          |

**Table S2 Comparison of photocatalytic efficacy of (Co<sub>0.45</sub>Zn<sub>0.45</sub>Ni<sub>0.10</sub>)-600 with previously reported photocatalysts**

| Material                                    | Pollutant | Pollutant conc. (mg/L) | Catalyst dosage (mg/L) | Degradation time (min) | % Degradation | Light source | Ref.      |
|---------------------------------------------|-----------|------------------------|------------------------|------------------------|---------------|--------------|-----------|
| 2D- La doped Bi <sub>2</sub> O <sub>3</sub> | CP        | 5                      | -                      | 120                    | 67            | Vis          | 1         |
| Fe- ZnO                                     | CP        | 10                     | 1000                   | 140                    | 67            | Solar light  | 2         |
| TiO <sub>2</sub>                            | CP        | 0.37                   | 20                     | 1440                   | 81            | UV           | 3         |
| rGO-Ag                                      | CP        | 1                      | 1000                   | 105                    | 75.5          | Vis          | 4         |
| BiFeO <sub>3</sub>                          | DOX       | 2                      | 300                    | 100                    | 79            | UV           | 5         |
| Pt-TiO <sub>2</sub>                         | DOX       | 10                     | 300                    | 100                    | 88            | Vis          | 6         |
| N- Co <sub>3</sub> O <sub>4</sub> / ZnO/NiO | DOX       | 25                     | 100                    | 120                    | 90            | Vis          | This work |
| N- Co <sub>3</sub> O <sub>4</sub> / ZnO/NiO | CP        | 5.6                    | 150                    | 120                    | 80.5          | Vis          | This work |

**Table S3 Conduction and valence band potentials of Co<sub>3</sub>O<sub>4</sub>, ZnO and NiO**

| Materials                      | $\chi$ (eV) | $E_g$ (eV) | $E_{VB}$ (eV) | $E_{CB}$ (eV) |
|--------------------------------|-------------|------------|---------------|---------------|
| Co <sub>3</sub> O <sub>4</sub> | 5.9         | 1.3        | 2.05          | 0.75          |
| ZnO                            | 5.79        | 3.1        | 2.84          | -0.26         |
| NiO                            | 3.44        | 3.5        | 0.69          | -2.81         |

## References

- [1] Khairnar SD, Kulkarni AN, Shinde SG, Marathe SD, Marathe YV, Dhole SD, Shrivastava VS. Synthesis and characterization of 2-D La-doped Bi<sub>2</sub>O<sub>3</sub> for photocatalytic degradation of organic dye and pesticide. *Journal of Photochemistry and Photobiology*. 2021 Jun 1;6:100030.
- [2] Shah NS, Iqbal J, Sayed M, Ghfar AA, Khan JA, Khan ZU, Murtaza B, Boczka G, Jamil F. Enhanced solar light photocatalytic performance of Fe-ZnO in the presence of H<sub>2</sub>O<sub>2</sub>, S<sub>2</sub>O<sub>8</sub><sup>2-</sup>, and HSO<sub>5</sub><sup>-</sup> for degradation of chlorpyrifos from agricultural wastes: toxicities investigation. *Chemosphere*. 2022 Jan 1;287:132331.
- [3] Budarz JF, Cooper EM, Gardner C, Hodzic E, Ferguson PL, Gunsch CK, Wiesner MR. Chlorpyrifos degradation via photoreactive TiO<sub>2</sub> nanoparticles: assessing the impact of a multi-component degradation scenario. *Journal of hazardous materials*. 2019 Jun 15;372:61-8.
- [4] Chinnappa K, Karuna Ananthai P, Srinivasan PP, Dharmaraj Glorybai C. Green synthesis of rGO-AgNP composite using *Curcubita maxima* extract for enhanced photocatalytic degradation of the organophosphate pesticide chlorpyrifos. *Environmental Science and Pollution Research*. 2022 Aug;29(38):58121-32.
- [5] Dumitru R, Ianculescu A, Păcurariu C, Lupa L, Pop A, Vasile B, Surdu A, Manea F. BiFeO<sub>3</sub>-synthesis, characterization and its photocatalytic activity towards doxorubicin degradation from water. *Ceramics international*. 2019 Feb 1;45(2):2789-802.
- [6] Kumar KY, Prashanth MK, Alduaij OK, Yousef TA, Abualnaja KM, Raghu MS. *Mentha arvensis* mediated green synthesis of platinum doped TiO<sub>2</sub> nanocomposite for enhanced anti-cancer and photocatalytic degradation activity: Insights from molecular docking and DFT studies. *Inorganic Chemistry Communications*. 2021 Dec 1;134:108987.
